# Supplementary material for: p120-catenin phosphorylation status alters E-cadherin mediated cell adhesion and ability of tumor cells to metastasize
Source: PubMed Central journal article supplement (PMC7319294; doi:10.1371/journal.pone.0235337), 2020-06-26

**Fig 1A**

**Phos-tag Gel**

4t1 cell lysates

E-cadherin  
antibody

NT Neu Act BI

P120-  
catenin

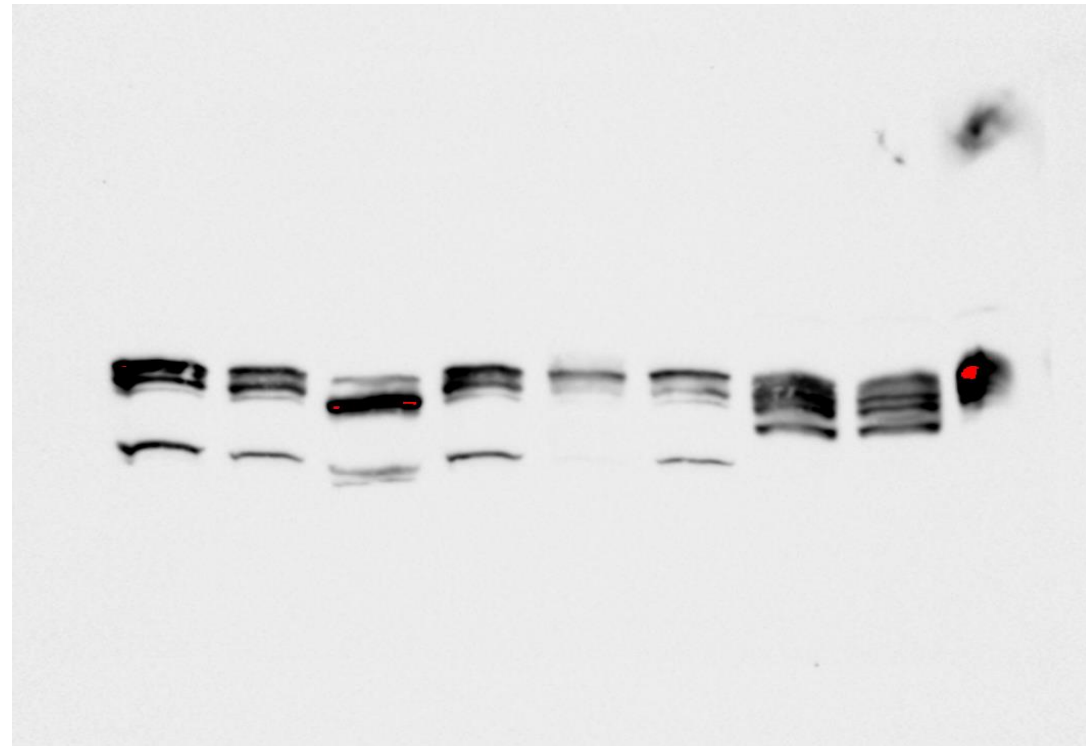

**Fig 1B**

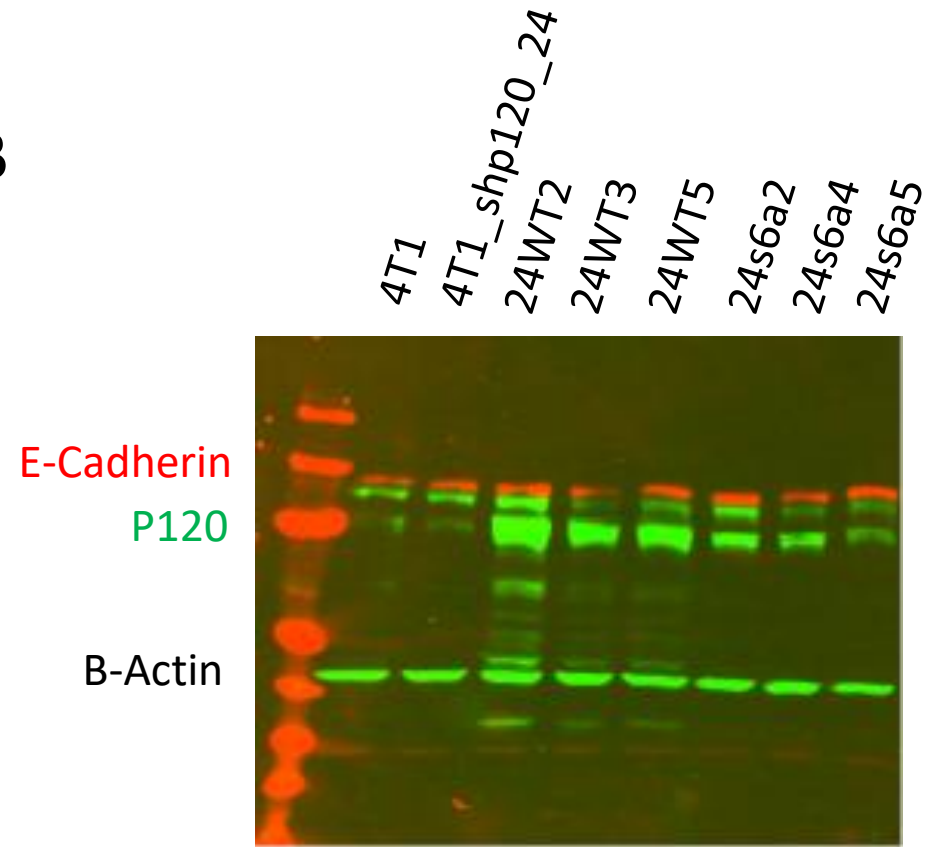

Supplement: pone.0235337.s006.pdf [file pone.0235337.s006.pdf]
